# Supplementary material for: Upper Respiratory Infection Drives Clinical Signs and Inflammatory Responses Following Heterologous Challenge of SARS-CoV-2 Variants of Concern in K18 Mice
Source: MDPI journal article supplement (doi:10.3390/v15040946), 2023-04-11
Supplement: s1 [file s1]

**Table S1. Non-synonymous (Ns) mutations of SARS-CoV-2 recovered from NT and lungs from mice infected or infected:challenged with WA1, Alpha or Delta.** To be included in the table, Ns mutation were present at a frequency higher than 1% and at a minimum depth of 100 reads per nucleotide.

| Ns mutation          | No. obs. | Group | dpi/dpc | Tissue | Ns mutation frequency (%) |
|----------------------|----------|-------|---------|--------|---------------------------|
| ORF1a:A3697V         | 2        | Alpha | 3       | lung   | 24.44                     |
| ORF1a:G82_M85delinsV | 4        | WA1   | 3       | lung   | 1.1 - 1.97                |
| ORF1a:G82_M85delinsV | 1        | Alpha | 3       | lung   | 3.68                      |
| ORF1a:I222V          | 2        | WA1   | 3       | lung   | 1.04 - 1.78               |
| ORF1a:M85del         | 1        | WA1   | 1       | lung   | 1.88                      |
| ORF1a:M85del         | 3        | WA1   | 3       | lung   | 1.04 - 1.99               |
| ORF1a:T1731I         | 4        | WA1   | 3       | lung   | 2.13 - 5.11               |
| ORF1b:D2175fs        | 1        | Alpha | 3       | lung   | 3.16                      |
| ORF1b:D2175fs        | 1        | Alpha | 1       | NT     | 4.26                      |
| ORF1b:L2497F         | 2        | WA1   | 1       | lung   | 2.1 - 2.26                |
| ORF1b:L2497F         | 4        | WA1   | 3       | lung   | 2.06 - 2.59               |
| ORF1b:L2497F         | 3        | WA1   | 1       | NT     | 4.24 - 7.01               |
| ORF1b:L2497F         | 3        | WA1   | 3       | NT     | 1.3 - 16.26               |
| ORF1b:L2497F         | 2        | Delta | 1       | lung   | 30-34                     |
| ORF1b:L2497F         | 2        | Delta | 3       | lung   | 43.00                     |
| ORF1b:L2497F         | 3        | Delta | 1       | NT     | 16 - 34                   |
| ORF1b:L2497F         | 2        | Delta | 3       | NT     | 27 - 32                   |
| ORF1b:K2395N         | 1        | Delta | 1       | lung   | 10.98                     |
| ORF1b:K2395N         | 2        | Delta | 3       | lung   | 5.91 - 8.45               |
| ORF1b:K2395N         | 4        | Delta | 1       | NT     | 9.68 - 12.5               |
| ORF1b:K2395N         | 1        | Delta | 3       | NT     | 8.52                      |
| S:N148K              | 2        | WA1   | 1       | lung   | 1.3 - 2.15                |
| S:N148K              | 2        | WA1   | 3       | lung   | 1.16 - 1.25               |
| S:N149K              | 2        | WA1   | 1       | lung   | 1.15 - 1.78               |
| S:N149K              | 3        | WA1   | 3       | lung   | 1.57 - 1.89               |
| S:N149K              | 2        | WA1   | 1       | NT     | 2.12 - 2.14               |
| S:N149K              | 1        | WA1   | 3       | NT     | 1.18                      |
| S:N99delinsKLNY      | 2        | WA1   | 1       | lung   | 1.18 - 2.13               |
| S:N99delinsKLNY      | 2        | WA1   | 3       | lung   | 1.07 - 1.42               |
| S:N99delinsKLNY      | 2        | WA1   | 1       | NT     | 2.42 - 5.23               |
| S:N99delinsKLNY      | 2        | WA1   | 3       | NT     | 7 - 8.03                  |
| S:D215_L216insKLRS   | 3        | WA1   | 1       | lung   | 7.39 - 11.22              |
| S:D215_L216insKLRS   | 3        | WA1   | 3       | lung   | 6.87 - 8.84               |
| S:D215_L216insKLRS   | 4        | WA1   | 1       | NT     | 5.17 - 11.46              |
| S:D215_L216insKLRS   | 2        | WA1   | 3       | NT     | 10.07 - 15.03             |
| S:D215N              | 2        | WA1   | 1       | lung   | 1.08 - 1.5                |
| S:D215N              | 1        | WA1   | 3       | lung   | 1.44                      |
| S:D215H              | 3        | WA1   | 1       | lung   | 29.75 - 33.84             |
| S:D215H              | 4        | WA1   | 3       | lung   | 33.75 - 46.74             |
| S:D215H              | 4        | WA1   | 1       | NT     | 17.52 - 44.34             |
| S:D215H              | 3        | WA1   | 3       | NT     | 17.31 - 38.3              |
| S:E1072K             | 2        | Delta | 3       | NT     | 1.89 - 2.37               |

|             |   |           |   |      |               |
|-------------|---|-----------|---|------|---------------|
| S:E96A      | 1 | WA1       | 1 | lung | 1.21          |
| S:E96A      | 2 | WA1       | 3 | lung | 1 - 1.01      |
| S:V62G      | 2 | WA1       | 1 | lung | 1.58 - 2.77   |
| S:V62G      | 4 | WA1       | 3 | lung | 1.58 - 2.17   |
| S:V62G      | 2 | WA1       | 1 | NT   | 2.79 - 2.98   |
| S:V62G      | 1 | Delta     | 3 | lung | 4.39          |
| ORF3a:A39S  | 1 | Alpha     | 3 | NT   | 2.48          |
| ORF3a:E239D | 1 | Alpha     | 3 | lung | 1.02          |
| ORF3a:E239D | 1 | Alpha     | 1 | NT   | 1.94          |
| ORF3a:E239D | 1 | Alpha     | 3 | NT   | 3.47          |
| ORF3a:H182Y | 1 | Alpha     | 1 | NT   | 7.73          |
| ORF3a:S165Y | 1 | Alpha     | 1 | NT   | 1.61          |
| ORF3a:T176I | 1 | Alpha     | 1 | NT   | 1.92          |
| M:I24R      | 1 | Alpha     | 3 | NT   | 2.29          |
| M:T7I       | 3 | WA1       | 1 | lung | 32.86 - 39.47 |
| M:T7I       | 4 | WA1       | 3 | lung | 41.24 - 47.04 |
| M:T7I       | 4 | WA1       | 1 | NT   | 23.22 - 53.16 |
| M:T7I       | 3 | WA1       | 3 | NT   | 28.36 - 43.36 |
| M:Y179fs    | 1 | Alpha     | 3 | NT   | 1             |
| ORF6:I33T   | 1 | Alpha     | 3 | NT   | 2.35          |
| ORF7a:*122L | 1 | Alpha     | 1 | lung | 1.29          |
| ORF8:Q23H   | 3 | Delta     | 1 | lung | 1.44 - 1.88   |
| ORF8:Q23H   | 4 | Delta     | 3 | lung | 1.26 - 1.98   |
| ORF8:Q23H   | 4 | Delta     | 1 | NT   | 1.42 - 3.59   |
| ORF8:Q23H   | 4 | Delta     | 3 | NT   | 1.59 - 3.94   |
| ORF8:S67F   | 1 | Alpha     | 1 | NT   | 1.4           |
| N:R14C      | 1 | Alpha     | 1 | NT   | 1.43          |
| N:P365L     | 1 | Alpha     | 1 | NT   | 3.57          |
| N:S194T     | 1 | WA1:Alpha | 3 | NT   | 98.02         |
| ORF10:L37F  | 1 | Alpha     | 1 | NT   | 1.13          |

**Abbreviations:** nonsynonymous mutation (Ns), observations (obs.), days post-infection (dpi), days post-challenge (dpc)

**Table S2. Fold change of Log<sub>2</sub> values of selected RNA-Seq transcripts from lungs of infection or infection:challenge groups as compared to mock-inoculated on 1 dpi, 1 dpc, 3 dpi, or 3 dpc. All values shown have a Log<sub>2</sub> fold change  $\geq 1.5$  and a p value  $\leq 0.05$ .**

| <i>Gene</i>   | 1 dpi |       |       | 1 dpc       |               |               | 3 dpi |       |       | 3 dpc       |               |               |
|---------------|-------|-------|-------|-------------|---------------|---------------|-------|-------|-------|-------------|---------------|---------------|
|               | WA1   | Alpha | Delta | WA1:<br>WA1 | WA1:<br>Alpha | WA1:<br>Delta | WA1   | Alpha | Delta | WA1:<br>WA1 | WA1:<br>Alpha | WA1:<br>Delta |
| <i>AICDA</i>  | -     | -     | -     | 3.38        | 2.94          | 4.75          | -     | -     | -     | 3.86        | 3.66          | 3.72          |
| <i>C3AR1</i>  | -     | -     | -     | -           | -             | -             | 4.15  | 2.91  | 2.67  | -           | -             | -             |
| <i>CCL2</i>   | 3.27  | 1.74  | 1.65  | -           | -             | 1.55          | 6.86  | 6.16  | 6.35  | -           | -             | -             |
| <i>CCL3</i>   | 1.80  | -     | -     | -           | 1.54          | -             | 3.02  | 3.06  | 2.86  | -           | -             | -             |
| <i>CD80</i>   | -     | -     | -     | -           | -             | -             | 2.00  | 1.58  | 1.45  | -           | -             | -             |
| <i>CD86</i>   | -     | -     | -     | -           | -             | -             | 1.58  | 1.69  | 1.37  | -           | -             | -             |
| <i>CD8A</i>   | 3.01  | -     | -     | -           | -             | -             | -     | -     | -     | -           | -             | -             |
| <i>CXCL10</i> | 6.10  | 3.72  | 4.25  | 2.91        | 2.82          | 3.97          | 7.59  | 7.85  | 7.81  | 2.10        | 2.22          | 2.30          |
| <i>CXCL11</i> | 6.33  | 3.19  | 3.50  | 3.61        | 3.39          | 4.57          | 8.26  | 8.57  | 8.15  | -           | -             | -             |
| <i>DDX58</i>  | -     | -     | -     | -           | -             | -             | 2.16  | 2.12  | 1.98  | -           | -             | -             |
| <i>FCGR1</i>  | 2.06  | 2.03  | 2.00  | -           | -             | -             | 4.27  | 3.74  | 3.70  | -           | -             | -             |
| <i>IDO1</i>   | -     | -     | -     | -           | -             | -             | 2.73  | 2.75  | 2.63  | -           | -             | -             |
| <i>IFIH1</i>  | -     | -     | -     | -           | -             | -             | 2.38  | 2.38  | 2.10  | -           | -             | -             |
| <i>IFNB1</i>  | 4.54  | -     | -     | -           | -             | -             | 8.95  | 8.39  | 6.84  | -           | -             | -             |
| <i>IFNG</i>   | -     | -     | -     | -           | -             | 1.68          | 2.06  | 2.63  | 2.17  | -           | -             | -             |
| <i>IL10</i>   | -     | -     | -     | -           | 3.10          | 3.11          | 3.07  | 2.85  | 2.03  | -           | -             | -             |
| <i>IL1RN</i>  | -     | -     | -     | -           | -             | -             | 2.89  | 2.93  | 2.58  | -           | -             | -             |
| <i>IL27</i>   | -     | -     | -     | -           | -             | -             | 2.59  | 2.89  | 2.51  | -           | -             | -             |
| <i>IL6</i>    | 3.41  | -     | -     | -           | -             | -             | 5.65  | 5.80  | 5.57  | -           | -             | -             |
| <i>IRF7</i>   | 3.06  | 3.00  | 2.68  | -           | -             | -             | 5.05  | 4.88  | 4.80  | -           | -             | -             |
| <i>JCHAIN</i> | -     | -     | -     | 4.35        | 4.40          | 4.21          | -     | -     | -     | 3.78        | 3.92          | 3.93          |
| <i>OAS2</i>   | 2.22  | 2.15  | 1.92  | -           | -             | -             | 2.95  | 2.81  | 2.66  | -           | -             | -             |
| <i>OAS3</i>   | 2.26  | 2.36  | 2.01  | -           | -             | -             | 4.14  | 4.05  | 3.74  | -           | -             | -             |
| <i>TLR2</i>   | -     | -     | -     | -           | -             | -             | 1.60  | 1.54  | -     | -           | -             | -             |
| <i>TLR7</i>   | -     | -     | -     | -           | -             | -             | 1.66  | -     | -     | -           | -             | -             |
| <i>TNF</i>    | -     | -     | -     | -           | -             | 1.56          | 2.54  | 2.66  | 2.47  | -           | -             | -             |
| <i>ZBP1</i>   | 2.92  | 2.75  | 2.56  | -           | -             | -             | 4.13  | 3.91  | 3.84  | -           | -             | -             |

**Abbreviations:** days post-infection (dpi), days post-challenge (dpc), dash (-) represent any fold change less than 1.5 and/or a P value  $<0.05$ .

**Table S3. Fold change of Log<sub>2</sub> values of selected RNA-Seq transcripts from nasal turbinates from infection or infection:challenge groups as compared to mock-inoculated on 1 dpi, 1 dpc, 3 dpi, or 3 dpc. All values shown have a Log<sub>2</sub> fold change  $\geq 1.5$  and a p value  $\leq 0.05$ .**

| <i>Gene</i>   | 1 dpi |       |       | 1 dpc       |               |               | 3 dpi |       |       | 3 dpc       |               |               |
|---------------|-------|-------|-------|-------------|---------------|---------------|-------|-------|-------|-------------|---------------|---------------|
|               | WA1   | Alpha | Delta | WA1:<br>WA1 | WA1:<br>Alpha | WA1:<br>Delta | WA1   | Alpha | Delta | WA1:<br>WA1 | WA1:<br>Alpha | WA1:<br>Delta |
| <i>C3AR1</i>  | -     | -     | -     | -           | -             | -             | 1.78  | -     | -     | -           | -             | -             |
| <i>CCL2</i>   | 3.94  | 3.22  | 3.49  | -           | -             | 2.86          | 4.29  | -     | -     | -           | -             | -             |
| <i>CCL22</i>  | -     | -     | 1.56  | -           | -             | 1.53          | -     | -     | -     | -           | -             | -             |
| <i>CCL3</i>   | 3.34  | 2.83  | 2.89  | -           | -             | -             | 1.98  | -     | -     | -           | -             | -             |
| <i>CCL5</i>   | 3.47  | 2.39  | 2.61  | -           | 2.32          | 2.92          | 3.02  | 2.84  | 2.95  | -           | -             | -             |
| <i>CD80</i>   | -     | -     | -     | -           | -             | -             | 1.56  | -     | -     | -           | -             | -             |
| <i>CD8A</i>   | 2.16  | 2.16  | 2.03  | 2.92        | 3.04          | 3.58          | 2.87  | 2.51  | 2.55  | 2.40        | 3.15          | 3.47          |
| <i>CXCL10</i> | 7.83  | 7.20  | 7.09  | -           | 5.39          | 6.01          | 5.60  | 3.33  | 3.85  | -           | -             | -             |
| <i>CXCL11</i> | 7.39  | 6.55  | 6.44  | -           | 5.66          | 6.16          | 4.01  | -     | -     | -           | -             | -             |
| <i>DDX58</i>  | 3.06  | 3.00  | 2.83  | -           | -             | 1.62          | 1.78  | -     | -     | -           | -             | -             |
| <i>FCGR1</i>  | 2.72  | 2.30  | 2.35  | -           | -             | -             | 2.70  | -     | 2.18  | -           | -             | -             |
| <i>IDO1</i>   | -     | -     | -     | -           | -             | 5.69          | 6.27  | -     | -     | -           | -             | -             |
| <i>IFIH1</i>  | 3.45  | 3.30  | 3.03  | -           | 1.57          | 1.95          | 2.03  | 1.66  | 2.06  | -           | -             | -             |
| <i>IFNB1</i>  | 7.87  | 8.24  | 7.27  | -           | -             | -             | 7.12  | -     | -     | -           | -             | -             |
| <i>IFNG</i>   | 4.94  | 4.28  | 4.17  | -           | 4.46          | 5.54          | 4.54  | -     | -     | -           | -             | -             |
| <i>IL15</i>   | -     | -     | -     | -           | -             | -             | -     | -     | -     | -           | -             | -             |
| <i>IL27</i>   | 3.60  | -     | -     | -           | -             | -             | -     | -     | -     | -           | -             | -             |
| <i>IL6</i>    | 7.77  | 6.85  | 6.59  | -           | -             | 4.49          | 4.14  | -     | -     | -           | -             | -             |
| <i>IRF7</i>   | 4.72  | 4.60  | 4.38  | -           | 2.96          | 3.44          | 4.01  | 4.16  | 4.60  | -           | -             | -             |
| <i>JCHAIN</i> | -     | -     | -     | 1.81        | -             | -             | -     | -     | -     | -           | -             | 2.71          |
| <i>NOS2</i>   | 2.10  | -     | -     | -           | -             | -             | -     | -     | -     | -           | -             | -             |
| <i>OAS2</i>   | 4.32  | 4.42  | 4.09  | -           | 3.13          | 3.46          | 2.89  | 2.80  | 3.19  | -           | -             | -             |
| <i>OAS3</i>   | 4.75  | 4.76  | 4.51  | -           | 3.47          | 3.86          | 3.77  | 3.10  | 3.72  | -           | -             | -             |
| <i>TLR2</i>   | 1.50  | -     | -     | -           | -             | -             | -     | -     | -     | -           | -             | -             |
| <i>TLR3</i>   | 2.74  | 2.62  | 2.44  | -           | -             | -             | -     | -     | -     | -           | -             | -             |
| <i>TLR7</i>   | -     | -     | -     | -           | -             | -             | 2.52  | -     | -     | -           | -             | -             |
| <i>TLR8</i>   | -     | -     | -     | -           | -             | -             | 2.29  | -     | -     | -           | -             | -             |
| <i>TNF</i>    | 2.57  | -     | -     | -           | -             | -             | -     | -     | -     | -           | -             | -             |
| <i>ISG15</i>  | 4.86  | 4.88  | 4.59  | -           | 3.27          | 3.52          | 3.12  | 3.39  | 3.90  | -           | -             | -             |
| <i>ZBP1</i>   | 4.85  | 4.68  | 4.56  | -           | 3.57          | 4.28          | 3.60  | 3.35  | 3.86  | -           | -             | -             |

**Abbreviations:** days post-infection (dpi), days post-challenge (dpc), dash (-) represent any fold change less than 1.5 and/or a P value <0.05.

**Table S4. Neutralizing titers of the pre- and post-challenge sera of mice against WA1, Alpha, or Delta antigen.**

| <b>Mouse ID</b> | <b>Challenge strain</b> | <b>Antigen</b> | <b>21 dpi</b> | <b>21 dpc</b> | <b>Fold change</b> |
|-----------------|-------------------------|----------------|---------------|---------------|--------------------|
| 117             | WA1                     | WA1            | 2213.8        | 5654.0        | 2.6                |
| 118             | WA1                     | WA1            | 937.2         | 2432.7        | 2.6                |
| 119             | WA1                     | WA1            | 2211.4        | 1527.4        | 0.7                |
| 120             | WA1                     | WA1            | 1895.6        | 2931.0        | 1.5                |
| 153             | Alpha                   | WA1            | 1042.7        | 1853.8        | 1.8                |
| 154             | Alpha                   | WA1            | 655.1         | 2425.2        | 3.7                |
| 155             | Alpha                   | WA1            | 904.2         | 1971.8        | 2.2                |
| 156             | Alpha                   | WA1            | 1166.0        | 1531.3        | 1.3                |
| 141             | Delta                   | WA1            | 1841.6        | 7272.8        | 3.9                |
| 142             | Delta                   | WA1            | 1554.7        | 3758.9        | 2.4                |
| 143             | Delta                   | WA1            | 3757.6        | 4213.8        | 1.1                |
| 144             | Delta                   | WA1            | 2924.3        | 3106.6        | 1.1                |
| 117             | WA1                     | Alpha          | 1224.0        | 4558.7        | 3.7                |
| 118             | WA1                     | Alpha          | 931.2         | 1364.6        | 1.5                |
| 119             | WA1                     | Alpha          | 1522.0        | 928.1         | 0.6                |
| 120             | WA1                     | Alpha          | 1171.4        | 1631.9        | 1.4                |
| 153             | Alpha                   | Alpha          | 831.2         | 1188.3        | 1.4                |
| 154             | Alpha                   | Alpha          | 558.2         | 2992.2        | 5.4                |
| 155             | Alpha                   | Alpha          | 669.3         | 2261.5        | 3.4                |
| 156             | Alpha                   | Alpha          | 560.6         | 2215.7        | 4.0                |
| 141             | Delta                   | Alpha          | 1074.9        | 1670.4        | 1.6                |
| 142             | Delta                   | Alpha          | 1639.8        | 3935.4        | 2.4                |
| 143             | Delta                   | Alpha          | 1089.6        | 1288.0        | 1.2                |
| 144             | Delta                   | Alpha          | 1751.5        | 1444.8        | 0.8                |
| 117             | WA1                     | Delta          | 246.1         | 2583.0        | 10.5               |
| 118             | WA1                     | Delta          | 123.0         | 835.4         | 6.8                |
| 119             | WA1                     | Delta          | 1711.0        | 457.2         | 0.3                |
| 120             | WA1                     | Delta          | 1776.1        | 1446.4        | 0.8                |
| 153             | Alpha                   | Delta          | 156.0         | 515.9         | 3.3                |
| 154             | Alpha                   | Delta          | 139.4         | 1650.6        | 11.8               |
| 155             | Alpha                   | Delta          | 130.1         | 234.9         | 1.8                |
| 156             | Alpha                   | Delta          | 320.5         | 738.0         | 2.3                |
| 141             | Delta                   | Delta          | 262.2         | 543.6         | 2.1                |
| 142             | Delta                   | Delta          | 332.8         | 1528.0        | 4.6                |

|     |       |       |       |       |     |
|-----|-------|-------|-------|-------|-----|
| 143 | Delta | Delta | 228.2 | 733.0 | 3.2 |
| 144 | Delta | Delta | 428.6 | 380.2 | 0.9 |

**Abbreviations:** days post-infection (dpi), days post-challenge (dpc).
